# Supplementary material
Source: publisher site journal article supplement (https://www.dovepress.com/article/272274)
Supplement: Supplementary file 1 [file get_supplementary_file.php]

**Figure S1**

**
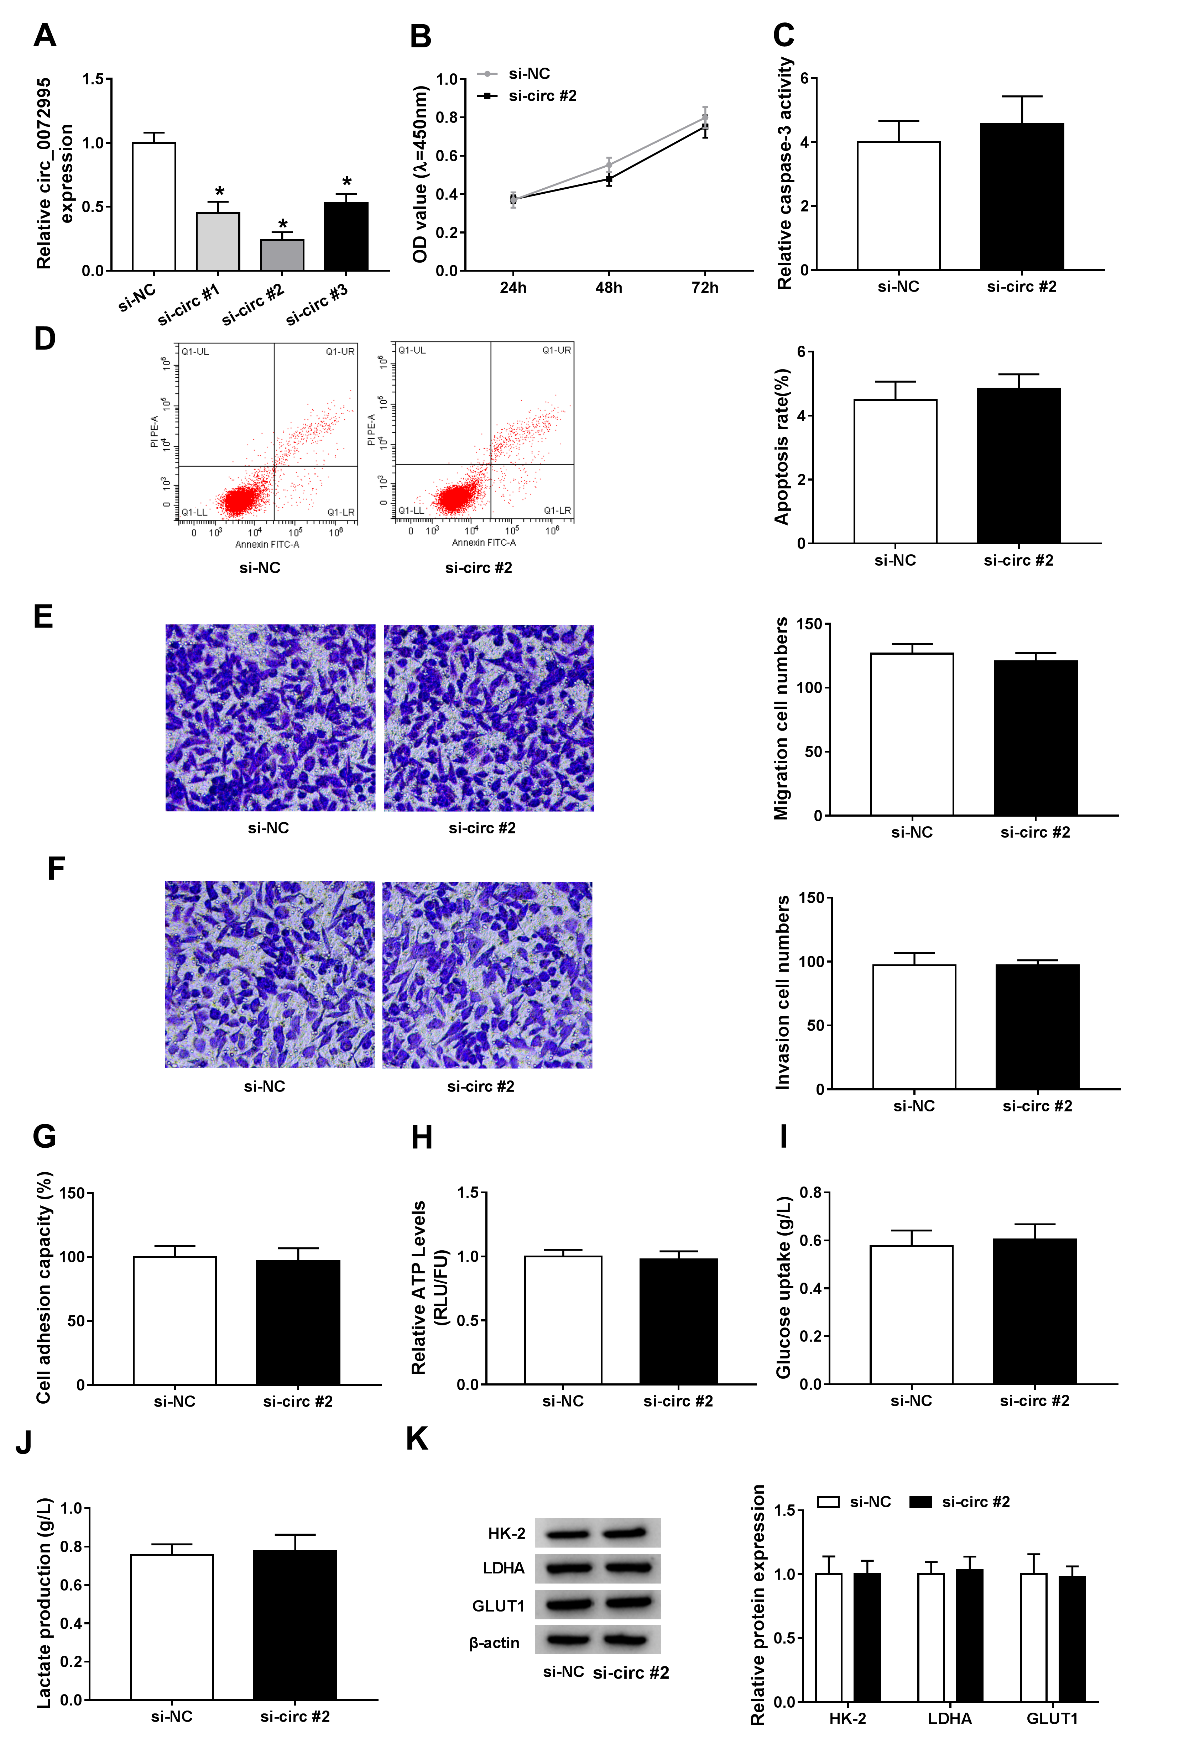
**

**Fig. S1 The effects of circ_0072995 knockdown on non-tumor cells. (A)** qRT-PCR analysis of circ_0072995 expression in MCF-10A cells transfected with si-NC, si-circ#1, si-circ#2, or si-circ#3. (B) The proliferation analysis of MCF-10A cells using CCK-8 assay. (C) Detection of caspase-3 activity in MCF-10A cells using a colorimetric assay kit. (D) Apoptosis analysis of MCF-10A cells using flow cytometry. (E, F) Analysis of MCF-10A cell migration and invasion with transwell assay (G) The analysis of MCF-10A cell adhesion ability using cell adhesion assay. (H-J) The ATP levels, glucose uptake, and lactate production analyses in MCF-10A using an ATP, glucose, or lactate assay kit, respectively. (K) Levels detection of HK-2, LDHA, and GLUT1 protein using western blot in MCF-10A cells. **P*<0.05.
